# Supplementary material
Source: MDPI journal article supplement (https://www.mdpi.com/2073-4395/11/11/2230)
Supplement: s1 [file s1]

**Table S1.** The inbred lines were comprised of 220 maize accessions selected to represent a wide range of diversity including 155 tropical and subtropical inbred lines from CIMMYT and 65 temperate inbreds from CAAS.

| Entry | Brief Name | Sample Name   | Pedigree           | Origin     | Environmental Adaptation | Kernel Color | Kernel Texture |
|-------|------------|---------------|--------------------|------------|--------------------------|--------------|----------------|
| G1    | 81565      | 81565         | Mexican population | China-SCAU | Tropical/Subtropical     | White        | Flint          |
| G2    | C5 RIL 10  | P1xP2 RIL 10  | P1xP2 RIL          | CIMMYT     | Tropical/Subtropical     | White        | Dent           |
| G3    | C5 RIL 108 | P1xP2 RIL 108 | P1xP2 RIL          | CIMMYT     | Tropical/Subtropical     | White        | Semi-dent      |
| G4    | C5 RIL 115 | P1xP2 RIL 115 | P1xP2 RIL          | CIMMYT     | Tropical/Subtropical     | White        | Semi-dent      |
| G5    | C5 RIL 124 | P1xP2 RIL 124 | P1xP2 RIL          | CIMMYT     | Tropical/Subtropical     | White        | Flint          |
| G6    | C5 RIL 129 | P1xP2 RIL 129 | P1xP2 RIL          | CIMMYT     | Tropical/Subtropical     | White        | Flint          |
| G7    | C5 RIL 13  | P1xP2 RIL 13  | P1xP2 RIL          | CIMMYT     | Tropical/Subtropical     | White        | Flint          |
| G8    | C5 RIL 142 | P1xP2 RIL 142 | P1xP2 RIL          | CIMMYT     | Tropical/Subtropical     | White        | Flint          |
| G9    | C5 RIL 146 | P1xP2 RIL 146 | P1xP2 RIL          | CIMMYT     | Tropical/Subtropical     | White        | Flint          |
| G10   | C5 RIL 151 | P1xP2 RIL 151 | P1xP2 RIL          | CIMMYT     | Tropical/Subtropical     | White        | Flint          |
| G11   | C5 RIL 153 | P1xP2 RIL 153 | P1xP2 RIL          | CIMMYT     | Tropical/Subtropical     | White        | Dent           |
| G12   | C5 RIL 155 | P1xP2 RIL 155 | P1xP2 RIL          | CIMMYT     | Tropical/Subtropical     | Light yellow | Dent           |
| G13   | C5 RIL 156 | P1xP2 RIL 156 | P1xP2 RIL          | CIMMYT     | Tropical/Subtropical     | White        | Semi-dent      |
| G14   | C5 RIL 163 | P1xP2 RIL 163 | P1xP2 RIL          | CIMMYT     | Tropical/Subtropical     | White        | Dent           |
| G15   | C5 RIL 164 | P1xP2 RIL 164 | P1xP2 RIL          | CIMMYT     | Tropical/Subtropical     | White        | Semi-dent      |
| G16   | C5 RIL 165 | P1xP2 RIL 165 | P1xP2 RIL          | CIMMYT     | Tropical/Subtropical     | White        | Dent           |

| Entry | Brief Name | Sample Name           | Pedigree          | Origin  | Environmental Adaptation | Kernel Color | Kernel Texture |
|-------|------------|-----------------------|-------------------|---------|--------------------------|--------------|----------------|
| G17   | C5 RIL 166 | P1xP2 RIL 166         | P1xP2 RIL         | CIMMY T | Tropical/Subtropical     | White        | Semi-dent      |
| G18   | C5 RIL 169 | P1xP2 RIL 169         | P1xP2 RIL         | CIMMY T | Tropical/Subtropical     | White        | Semi-dent      |
| G19   | C5 RIL 170 | P1xP2 RIL 170         | P1xP2 RIL         | CIMMY T | Tropical/Subtropical     | White        | Semi-dent      |
| G20   | C5 RIL 176 | P1xP2 RIL 176         | P1xP2 RIL         | CIMMY T | Tropical/Subtropical     | White        | Semi-dent      |
| G21   | C5 RIL 177 | P1xP2 RIL 177         | P1xP2 RIL         | CIMMY T | Tropical/Subtropical     | White        | Flint          |
| G22   | C5 RIL 178 | P1xP2 RIL 178         | P1xP2 RIL         | CIMMY T | Tropical/Subtropical     | White        | Flint          |
| G23   | C5 RIL 181 | P1xP2 RIL 181         | P1xP2 RIL         | CIMMY T | Tropical/Subtropical     | White        | Semi-dent      |
| G24   | C5 RIL 182 | P1xP2 RIL 182         | P1xP2 RIL         | CIMMY T | Tropical/Subtropical     | White        | Flint          |
| G25   | C6 RIL 184 | CML444xMalawi RIL 184 | CML444xMalawi RIL | CIMMY T | Tropical/Subtropical     | White        | Dent           |
| G26   | C6 RIL 188 | CML444xMalawi RIL 188 | CML444xMalawi RIL | CIMMY T | Tropical/Subtropical     | White        | Flint          |
| G27   | C6 RIL 19  | CML444xMalawi RIL 19  | CML444xMalawi RIL | CIMMY T | Tropical/Subtropical     | White        | Semi-dent      |
| G28   | C6 RIL 190 | CML444xMalawi RIL 190 | CML444xMalawi RIL | CIMMY T | Tropical/Subtropical     | White        | Dent           |
| G29   | C6 RIL 194 | CML444xMalawi RIL 194 | CML444xMalawi RIL | CIMMY T | Tropical/Subtropical     | White        | Dent           |
| G30   | C6 RIL 203 | CML444xMalawi RIL 203 | CML444xMalawi RIL | CIMMY T | Tropical/Subtropical     | White        | Semi-dent      |
| G31   | C6 RIL 212 | CML444xMalawi RIL 212 | CML444xMalawi RIL | CIMMY T | Tropical/Subtropical     | White        | Dent           |
| G32   | C6 RIL 218 | CML444xMalawi RIL 218 | CML444xMalawi RIL | CIMMY T | Tropical/Subtropical     | White        | Semi-dent      |
| G33   | C6 RIL 219 | CML444xMalawi RIL 219 | CML444xMalawi RIL | CIMMY T | Tropical/Subtropical     | White        | Flint          |
| G34   | C6 RIL 23  | CML444xMalawi RIL 23  | CML444xMalawi RIL | CIMMY T | Tropical/Subtropical     | White        | Semi-dent      |

| Entry | Brief Name | Sample Name           | Pedigree          | Origin  | Environmental Adaptation | Kernel Color | Kernel Texture |
|-------|------------|-----------------------|-------------------|---------|--------------------------|--------------|----------------|
| G3 5  | C6 RIL 230 | CML444xMalawi RIL 230 | CML444xMalawi RIL | CIMMY T | Tropical/Subtropical     | White        | Dent           |
| G3 6  | C6 RIL 234 | CML444xMalawi RIL 234 | CML444xMalawi RIL | CIMMY T | Tropical/Subtropical     | White        | Semi-dent      |
| G3 7  | C6 RIL 239 | CML444xMalawi RIL 239 | CML444xMalawi RIL | CIMMY T | Tropical/Subtropical     | White        | Semi-dent      |
| G3 8  | C6 RIL 24  | CML444xMalawi RIL 24  | CML444xMalawi RIL | CIMMY T | Tropical/Subtropical     | White        | Flint          |
| G3 9  | C6 RIL 241 | CML444xMalawi RIL 241 | CML444xMalawi RIL | CIMMY T | Tropical/Subtropical     | White        | Semi-dent      |
| G4 0  | C6 RIL 243 | CML444xMalawi RIL 243 | CML444xMalawi RIL | CIMMY T | Tropical/Subtropical     | White        | Semi-dent      |
| G4 1  | C6 RIL 249 | CML444xMalawi RIL 249 | CML444xMalawi RIL | CIMMY T | Tropical/Subtropical     | White        | Flint          |
| G4 2  | C6 RIL 25  | CML444xMalawi RIL 25  | CML444xMalawi RIL | CIMMY T | Tropical/Subtropical     | White        | Dent           |
| G4 3  | C6 RIL 258 | CML444xMalawi RIL 258 | CML444xMalawi RIL | CIMMY T | Tropical/Subtropical     | White        | Flint          |
| G4 4  | C6 RIL 267 | CML444xMalawi RIL 267 | CML444xMalawi RIL | CIMMY T | Tropical/Subtropical     | White        | Dent           |
| G4 5  | C6 RIL 268 | CML444xMalawi RIL 268 | CML444xMalawi RIL | CIMMY T | Tropical/Subtropical     | White        | Semi-dent      |
| G4 6  | C6 RIL 272 | CML444xMalawi RIL 272 | CML444xMalawi RIL | CIMMY T | Tropical/Subtropical     | White        | Semi-dent      |
| G4 7  | C6 RIL 273 | CML444xMalawi RIL 273 | CML444xMalawi RIL | CIMMY T | Tropical/Subtropical     | White        | Semi-dent      |
| G4 8  | C6 RIL 283 | CML444xMalawi RIL 283 | CML444xMalawi RIL | CIMMY T | Tropical/Subtropical     | White        | Dent           |
| G4 9  | C6 RIL 289 | CML444xMalawi RIL 289 | CML444xMalawi RIL | CIMMY T | Tropical/Subtropical     | White        | Flint          |
| G5 0  | C6 RIL 29  | CML444xMalawi RIL 29  | CML444xMalawi RIL | CIMMY T | Tropical/Subtropical     | White        | Dent           |
| G5 1  | C6 RIL 293 | CML444xMalawi RIL 293 | CML444xMalawi RIL | CIMMY T | Tropical/Subtropical     | White        | Flint          |
| G5 2  | C6 RIL 298 | CML444xMalawi RIL 298 | CML444xMalawi RIL | CIMMY T | Tropical/Subtropical     | White        | Semi-dent      |

| Entry | Brief Name | Sample Name           | Pedigree          | Origin  | Environmental Adaptation | Kernel Color | Kernel Texture |
|-------|------------|-----------------------|-------------------|---------|--------------------------|--------------|----------------|
| G5 3  | C6 RIL 3   | CML444xMalawi RIL 3   | CML444xMalawi RIL | CIMMY T | Tropical/Subtropical     | White        | Dent           |
| G5 4  | C6 RIL 303 | CML444xMalawi RIL 303 | CML444xMalawi RIL | CIMMY T | Tropical/Subtropical     | White        | Dent           |
| G5 5  | C6 RIL 32  | CML444xMalawi RIL 32  | CML444xMalawi RIL | CIMMY T | Tropical/Subtropical     | White        | Semi-dent      |
| G5 6  | C6 RIL 324 | CML444xMalawi RIL 324 | CML444xMalawi RIL | CIMMY T | Tropical/Subtropical     | White        | Dent           |
| G5 7  | C6 RIL 327 | CML444xMalawi RIL 327 | CML444xMalawi RIL | CIMMY T | Tropical/Subtropical     | White        | Dent           |
| G5 8  | C6 RIL 337 | CML444xMalawi RIL 337 | CML444xMalawi RIL | CIMMY T | Tropical/Subtropical     | White        | Semi-dent      |
| G5 9  | C6 RIL 341 | CML444xMalawi RIL 341 | CML444xMalawi RIL | CIMMY T | Tropical/Subtropical     | White        | Semi-dent      |
| G6 0  | C6 RIL 348 | CML444xMalawi RIL 348 | CML444xMalawi RIL | CIMMY T | Tropical/Subtropical     | White        | Semi-dent      |
| G6 1  | C6 RIL 352 | CML444xMalawi RIL 352 | CML444xMalawi RIL | CIMMY T | Tropical/Subtropical     | White        | Semi-dent      |
| G6 2  | C6 RIL 356 | CML444xMalawi RIL 356 | CML444xMalawi RIL | CIMMY T | Tropical/Subtropical     | White        | Flint          |
| G6 3  | C6 RIL 36  | CML444xMalawi RIL 36  | CML444xMalawi RIL | CIMMY T | Tropical/Subtropical     | White        | Dent           |
| G6 4  | C6 RIL 361 | CML444xMalawi RIL 361 | CML444xMalawi RIL | CIMMY T | Tropical/Subtropical     | White        | Semi-dent      |
| G6 5  | C6 RIL 367 | CML444xMalawi RIL 367 | CML444xMalawi RIL | CIMMY T | Tropical/Subtropical     | White        | Dent           |
| G6 6  | C6 RIL 379 | CML444xMalawi RIL 379 | CML444xMalawi RIL | CIMMY T | Tropical/Subtropical     | White        | Flint          |
| G6 7  | C6 RIL 39  | CML444xMalawi RIL 39  | CML444xMalawi RIL | CIMMY T | Tropical/Subtropical     | White        | Semi-dent      |
| G6 8  | C6 RIL 390 | CML444xMalawi RIL 390 | CML444xMalawi RIL | CIMMY T | Tropical/Subtropical     | White        | Semi-dent      |
| G6 9  | C6 RIL 395 | CML444xMalawi RIL 395 | CML444xMalawi RIL | CIMMY T | Tropical/Subtropical     | White        | Flint          |
| G7 0  | C6 RIL 40  | CML444xMalawi RIL 40  | CML444xMalawi RIL | CIMMY T | Tropical/Subtropical     | White        | Flint          |

| Entry | Brief Name  | Sample Name                                 | Pedigree                                   | Origin     | Environmental Adaptation | Kernel Color | Kernel Texture |
|-------|-------------|---------------------------------------------|--------------------------------------------|------------|--------------------------|--------------|----------------|
| G7 1  | C6 RIL 400  | CML444xMalawi RIL 400                       | CML444xMalawi RIL                          | CIMMY T    | Tropical/Subtropical     | White        | Semi-dent      |
| G7 2  | C6 RIL 402  | CML444xMalawi RIL 402                       | CML444xMalawi RIL                          | CIMMY T    | Tropical/Subtropical     | White        | Semi-dent      |
| G7 3  | C6 RIL 403  | CML444xMalawi RIL 403                       | CML444xMalawi RIL                          | CIMMY T    | Tropical/Subtropical     | White        | Semi-dent      |
| G7 4  | C6 RIL 42   | CML444xMalawi RIL 42                        | CML444xMalawi RIL                          | CIMMY T    | Tropical/Subtropical     | White        | Semi-dent      |
| G7 5  | C6 RIL 47   | CML444xMalawi RIL 47                        | CML444xMalawi RIL                          | CIMMY T    | Tropical/Subtropical     | White        | Semi-dent      |
| G7 6  | C6 RIL 53   | CML444xMalawi RIL 53                        | CML444xMalawi RIL                          | CIMMY T    | Tropical/Subtropical     | White        | Flint          |
| G7 7  | C6 RIL 83   | CML444xMalawi RIL 83                        | CML444xMalawi RIL                          | CIMMY T    | Tropical/Subtropical     | White        | Dent           |
| G7 8  | C6 RIL 85   | CML444xMalawi RIL 85                        | CML444xMalawi RIL                          | CIMMY T    | Tropical/Subtropical     | White        | Semi-dent      |
| G7 9  | C6 RIL 95   | CML444xMalawi RIL 95                        | CML444xMalawi RIL                          | CIMMY T    | Tropical/Subtropical     | White        | Dent           |
| G8 0  | C6 RIL 97   | CML444xMalawi RIL 97                        | CML444xMalawi RIL                          | CIMMY T    | Tropical/Subtropical     | White        | Flint          |
| G8 1  | CA_BI_02_06 | (Huangzao4xMo17)x Huangzao4 BC4F2 HS7-6-R11 | (Huangzao4xMo17)xHuangzao4 BC4F2 HS7-6-R11 | China-CAAS | Temperate                | Yellow       | Semi-dent      |
| G8 2  | CA_BI_02_08 | (Huangzao4xMo17)x Huangzao4 BC4F2 HS7-8-R15 | (Huangzao4xMo17)xHuangzao4 BC4F2 HS7-8-R15 | China-CAAS | Temperate                | Yellow       | Dent           |
| G8 3  | CA_BI_03_04 | (Chang7-2xSH15)xChang7-2 BC4F2 HS11-4-R5    | (Chang7-2xSH15)xChang7-2 BC4F2 HS11-4-R5   | China-CAAS | Temperate                | Yellow       | Dent           |
| G8 4  | CA_BI_04_01 | (Chang7-2xQi319)xChang7-2 BC4F2 HS12-1-R1   | (Chang7-2xQi319)xChang7-2 BC4F2 HS12-1-R1  | China-CAAS | Temperate                | Yellow       | Dent           |
| G8 5  | CA_BI_04_08 | (Chang7-2xQi319)xChang7-2 BC4F2 HS12-9-R10  | (Chang7-2xQi319)xChang7-2 BC4F2 HS12-9-R10 | China-CAAS | Temperate                | Yellow       | Semi-dent      |
| G8 6  | CA_BI_05_01 | (Ye478xJi1037)xYe478 BC4F2 HS14-1-R1        | (Ye478xJi1037)xYe478 BC4F2 HS14-1-R1       | China-CAAS | Temperate                | Yellow       | Dent           |
| G8 7  | CA_BI_06_02 | (Ye478xSH15)xYe478 BC4F2 HS15-2-R5          | (Ye478xSH15)xYe478 BC4F2 HS15-2-R5         | China-CAAS | Temperate                | Yellow       | Dent           |
| G8 8  | CA_BI_06_03 | (Ye478xSH15)xYe478 BC4F2 HS15-3-R8          | (Ye478xSH15)xYe478 BC4F2 HS15-3-R8         | China-CAAS | Temperate                | Yellow       | Dent           |

| Ent ry | Brief Name  | Sample Name                               | Pedigree                                  | Origin     | Environmental Adaptation | Kernel Color | Kernel Texture |
|--------|-------------|-------------------------------------------|-------------------------------------------|------------|--------------------------|--------------|----------------|
| G89    | CA_BI_06_04 | (Ye478xSH15)xYe478 BC4F2 HS15-4-R10       | (Ye478xSH15)xYe478 BC4F2 HS15-4-R10       | China-CAAS | Temperate                | Yellow       | Dent           |
| G90    | CA_BI_06_05 | (Ye478xSH15)xYe478 BC4F2 HS15-5-R11       | (Ye478xSH15)xYe478 BC4F2 HS15-5-R11       | China-CAAS | Temperate                | Yellow       | Dent           |
| G91    | CA_BI_06_06 | (Ye478xSH15)xYe478 BC4F2 HS15-6-R13       | (Ye478xSH15)xYe478 BC4F2 HS15-6-R13       | China-CAAS | Temperate                | Yellow       | Dent           |
| G92    | CA_BI_06_07 | (Ye478xSH15)xYe478 BC4F2 HS15-7-R14       | (Ye478xSH15)xYe478 BC4F2 HS15-7-R14       | China-CAAS | Temperate                | Yellow       | Dent           |
| G93    | CA_BI_06_08 | (Ye478xSH15)xYe478 BC4F2 HS15-8-R15       | (Ye478xSH15)xYe478 BC4F2 HS15-8-R15       | China-CAAS | Temperate                | Yellow       | Semi-dent      |
| G94    | CA_BI_07_05 | (Ye478xZhongzi01)xYe478 BC4F2 HS16-6-R8   | (Ye478xZhongzi01)xYe478 BC4F2 HS16-6-R8   | China-CAAS | Temperate                | Yellow       | Dent           |
| G95    | CA_BI_07_06 | (Ye478xZhongzi01)xYe478 BC4F2 HS16-7-R9   | (Ye478xZhongzi01)xYe478 BC4F2 HS16-7-R9   | China-CAAS | Temperate                | Yellow       | Dent           |
| G96    | CA_BI_07_07 | (Ye478xZhongzi01)xYe478 BC4F2 HS16-8-R10  | (Ye478xZhongzi01)xYe478 BC4F2 HS16-8-R10  | China-CAAS | Temperate                | Yellow       | Dent           |
| G97    | CA_BI_07_10 | (Ye478xZhongzi01)xYe478 BC4F2 HS16-11-R14 | (Ye478xZhongzi01)xYe478 BC4F2 HS16-11-R14 | China-CAAS | Temperate                | Yellow       | Dent           |
| G98    | CA_BI_07_11 | (Ye478xZhongzi01)xYe478 BC4F2 HS16-12-R15 | (Ye478xZhongzi01)xYe478 BC4F2 HS16-12-R15 | China-CAAS | Temperate                | Yellow       | Dent           |
| G99    | CA_BI_11_03 | (Ye478?Ji1037)?Ye478 BC4F2-54-8 Lx54-8    | (Ye478?Ji1037)?Ye478 BC4F2-54-8 Lx54-8    | China-CAAS | Temperate                | Yellow       | Dent           |
| G100   | CA_BI_12_01 | (Ye478?SH15)?Ye478 BC4F2-63-3 Lx63-3      | (Ye478?SH15)?Ye478 BC4F2-63-3 Lx63-3      | China-CAAS | Temperate                | Yellow       | Dent           |
| G101   | CA_BI_12_02 | (Ye478?SH15)?Ye478 BC4F2-69-11 Lx69-11    | (Ye478?SH15)?Ye478 BC4F2-69-11 Lx69-11    | China-CAAS | Temperate                | Yellow       | Semi-dent      |
| G102   | CA_BI_12_03 | (Ye478?SH15)?Ye478 BC4F2-69-12 Lx69-12    | (Ye478?SH15)?Ye478 BC4F2-69-12 Lx69-12    | China-CAAS | Temperate                | Yellow       | Semi-dent      |
| G103   | CA_BI_23_01 | (Qi205?Dan340) BC2F4-1-26-1 XZY372-1      | (Qi205?Dan340) BC2F4-1-26-1 XZY372-1      | China-CAAS | Temperate                | Yellow       | Dent           |
| G104   | CA_BI_23_02 | (Qi205?Dan340) BC2F4-1-27-1 XZY420-1      | (Qi205?Dan340) BC2F4-1-27-1 XZY420-1      | China-CAAS | Temperate                | Yellow       | Dent           |
| G105   | CA_BI_23_03 | (Qi205?Dan340) BC2F4-1-47-1 XZY405-1      | (Qi205?Dan340) BC2F4-1-47-1 XZY405-1      | China-CAAS | Temperate                | Yellow       | Dent           |
| G106   | CA_BI_23_04 | (Qi205?Dan340) BC2F4-1-61-1 XZY357-1      | (Qi205?Dan340) BC2F4-1-61-1 XZY357-1      | China-CAAS | Temperate                | Yellow       | Dent           |

| Ent ry | Brief Name  | Sample Name                               | Pedigree                               | Origin     | Environmental Adaptation | Kernel Color | Kernel Texture |
|--------|-------------|-------------------------------------------|----------------------------------------|------------|--------------------------|--------------|----------------|
| G1 07  | CA_BI_23_05 | (Qi205?Dan340) BC2F4-1-106-1<br>XZY407-1  | (Qi205?Dan340) BC2F4-1-106-1 XZY407-1  | China-CAAS | Temperate                | Yellow       | Semi-dent      |
| G1 08  | CA_BI_24_01 | (Dan340?Tai9537) BC2F4-1-9-1<br>XZY468-1  | (Dan340?Tai9537) BC2F4-1-9-1 XZY468-1  | China-CAAS | Temperate                | Yellow       | Dent           |
| G1 09  | CA_BI_24_02 | (Dan340?Tai9537) BC2F4-1-49-1<br>XZY429-1 | (Dan340?Tai9537) BC2F4-1-49-1 XZY429-1 | China-CAAS | Temperate                | Yellow       | Dent           |
| G1 10  | CA_BI_24_03 | (Dan340?Tai9537) BC2F4-1-58-1<br>XZY419-1 | (Dan340?Tai9537) BC2F4-1-58-1 XZY419-1 | China-CAAS | Temperate                | Yellow       | Dent           |
| G1 11  | CA_BI_26_01 | (Qi319?Hai9-21) BC2F4-1-17-1<br>XZY460-1  | (Qi319?Hai9-21) BC2F4-1-17-1 XZY460-1  | China-CAAS | Temperate                | Yellow       | Semi-dent      |
| G1 12  | CA_BI_26_02 | (Qi319?Hai9-21) BC2F4-1-32-1<br>XZY481-1  | (Qi319?Hai9-21) BC2F4-1-32-1 XZY481-1  | China-CAAS | Temperate                | Yellow       | Dent           |
| G1 13  | CA_BI_26_03 | (Qi319?Hai9-21) BC2F4-1-50-1<br>XZY411-1  | (Qi319?Hai9-21) BC2F4-1-50-1 XZY411-1  | China-CAAS | Temperate                | Yellow       | Dent           |
| G1 14  | CA_BI_26_04 | (Qi319?Hai9-21) BC2F4-1-87-1<br>XZY356-1  | (Qi319?Hai9-21) BC2F4-1-87-1 XZY356-1  | China-CAAS | Temperate                | Yellow       | Semi-dent      |
| G1 15  | CA_BI_26_05 | (Qi319?Hai9-21) BC2F4-1-116-1<br>XZY403-1 | (Qi319?Hai9-21) BC2F4-1-116-1 XZY403-1 | China-CAAS | Temperate                | Yellow       | Dent           |
| G1 16  | CA_BI_27_01 | (Qi319?TS6047) BC2F4-1-31-1<br>XZY454-1   | (Qi319?TS6047) BC2F4-1-31-1 XZY454-1   | China-CAAS | Temperate                | Yellow       | Semi-dent      |
| G1 17  | CA_BI_27_02 | (Qi319?TS6047) BC2F4-1-42-1<br>XZY348-1   | (Qi319?TS6047) BC2F4-1-42-1 XZY348-1   | China-CAAS | Temperate                | Yellow       | Semi-dent      |
| G1 18  | CA_BI_27_03 | (Qi319?TS6047) BC2F4-1-59-1<br>XZY463-1   | (Qi319?TS6047) BC2F4-1-59-1 XZY463-1   | China-CAAS | Temperate                | Yellow       | Dent           |
| G1 19  | CA_BI_27_04 | (Qi319?TS6047) BC2F4-1-63-1<br>XZY345-1   | (Qi319?TS6047) BC2F4-1-63-1 XZY345-1   | China-CAAS | Temperate                | Yellow       | Semi-dent      |
| G1 20  | CA_BI_28_01 | (Qi319?Shen118) BC2F4-2-10-1<br>XZY476-1  | (Qi319?Shen118) BC2F4-2-10-1 XZY476-1  | China-CAAS | Temperate                | Yellow       | Dent           |
| G1 21  | CA_BI_28_02 | (Qi319?Shen118) BC2F4-2-51-1<br>XZY359-1  | (Qi319?Shen118) BC2F4-2-51-1 XZY359-1  | China-CAAS | Temperate                | Yellow       | Dent           |
| G1 22  | CA_BI_28_03 | (Qi319?Shen118) BC2F4-2-66-1<br>XZY342-1  | (Qi319?Shen118) BC2F4-2-66-1 XZY342-1  | China-CAAS | Temperate                | Yellow       | Dent           |
| G1 23  | CA_BI_28_04 | (Qi319?Shen118) BC2F4-2-81-1<br>XZY404-1  | (Qi319?Shen118) BC2F4-2-81-1 XZY404-1  | China-CAAS | Temperate                | Yellow       | Dent           |
| G1 24  | CA_BI_28_05 | (Qi319?Shen118) BC2F4-2-180-1<br>XZY364-1 | (Qi319?Shen118) BC2F4-2-180-1 XZY364-1 | China-CAAS | Temperate                | Yellow       | Dent           |

| Ent ry   | Brief Name      | Sample Name                               | Pedigree                               | Origin         | Environmental Adaptation | Kernel Color | Kernel Texture |
|----------|-----------------|-------------------------------------------|----------------------------------------|----------------|--------------------------|--------------|----------------|
| G1<br>25 | CA_BI_<br>29_01 | (Qi319?Cai11-8) BC2F4-1-6-1<br>XZY409-1   | (Qi319?Cai11-8) BC2F4-1-6-1 XZY409-1   | China-<br>CAAS | Temperate                | Yellow       | Dent           |
| G1<br>26 | CA_BI_<br>29_02 | (Qi319?Cai11-8) BC2F4-1-22-1<br>XZY425-1  | (Qi319?Cai11-8) BC2F4-1-22-1 XZY425-1  | China-<br>CAAS | Temperate                | Yellow       | Dent           |
| G1<br>27 | CA_BI_<br>30_01 | (Ye478?Cai11-8) BC2F4-1-43-1<br>XZY501-1  | (Ye478?Cai11-8) BC2F4-1-43-1 XZY501-1  | China-<br>CAAS | Temperate                | Yellow       | Dent           |
| G1<br>28 | CA_BI_<br>30_02 | (Ye478?Cai11-8) BC2F4-1-45-1<br>XZY506-1  | (Ye478?Cai11-8) BC2F4-1-45-1 XZY506-1  | China-<br>CAAS | Temperate                | Yellow       | Dent           |
| G1<br>29 | CA_BI_<br>30_03 | (Ye478?Cai11-8) BC2F4-1-57-1<br>XZY505-1  | (Ye478?Cai11-8) BC2F4-1-57-1 XZY505-1  | China-<br>CAAS | Temperate                | Yellow       | Dent           |
| G1<br>30 | CA_BI_<br>30_04 | (Ye478?Cai11-8) BC2F4-1-147-1<br>XZY470-1 | (Ye478?Cai11-8) BC2F4-1-147-1 XZY470-1 | China-<br>CAAS | Temperate                | Yellow       | Dent           |
| G1<br>31 | CA_BI_<br>31_01 | (Ye478?B84) BC2F4-1-30-1 XZY444-<br>1     | (Ye478?B84) BC2F4-1-30-1 XZY444-1      | China-<br>CAAS | Temperate                | Yellow       | Dent           |
| G1<br>32 | CA_BI_<br>31_02 | (Ye478?B84) BC2F4-1-31-1 XZY492-<br>1     | (Ye478?B84) BC2F4-1-31-1 XZY492-1      | China-<br>CAAS | Temperate                | Yellow       | Dent           |
| G1<br>33 | CA_BI_<br>31_03 | (Ye478?B84) BC2F4-1-65-1 XZY452-<br>1     | (Ye478?B84) BC2F4-1-65-1 XZY452-1      | China-<br>CAAS | Temperate                | Yellow       | Dent           |
| G1<br>34 | CA_BI_<br>31_04 | (Ye478?B84) BC2F4-1-71-1 XZY507-<br>1     | (Ye478?B84) BC2F4-1-71-1 XZY507-1      | China-<br>CAAS | Temperate                | Yellow       | Dent           |
| G1<br>35 | CA_BI_<br>32_01 | (Ye478?Hai9-21) BC2F4-2-21-1<br>XZY382-1  | (Ye478?Hai9-21) BC2F4-2-21-1 XZY382-1  | China-<br>CAAS | Temperate                | Yellow       | Dent           |
| G1<br>36 | CA_BI_<br>32_02 | (Ye478?Hai9-21) BC2F4-2-23-1<br>XZY423-1  | (Ye478?Hai9-21) BC2F4-2-23-1 XZY423-1  | China-<br>CAAS | Temperate                | Yellow       | Dent           |
| G1<br>37 | CA_BI_<br>32_03 | (Ye478?Hai9-21) BC2F4-2-40-1<br>XZY504-1  | (Ye478?Hai9-21) BC2F4-2-40-1 XZY504-1  | China-<br>CAAS | Temperate                | Yellow       | Semi-<br>dent  |
| G1<br>38 | CA_BI_<br>32_04 | (Ye478?Hai9-21) BC2F4-2-60-1<br>XZY385-1  | (Ye478?Hai9-21) BC2F4-2-60-1 XZY385-1  | China-<br>CAAS | Temperate                | Yellow       | Dent           |
| G1<br>39 | CA_BI_<br>32_05 | (Ye478?Hai9-21) BC2F4-2-79-1<br>XZY399-1  | (Ye478?Hai9-21) BC2F4-2-79-1 XZY399-1  | China-<br>CAAS | Temperate                | Yellow       | Dent           |
| G1<br>40 | CA_BI_<br>33_01 | (Ye478?TS6047) BC2F4-1-24-1<br>XZY400-1   | (Ye478?TS6047) BC2F4-1-24-1 XZY400-1   | China-<br>CAAS | Temperate                | Yellow       | Dent           |
| G1<br>41 | CA_BI_<br>33_02 | (Ye478?TS6047) BC2F4-1-29-1<br>XZY495-1   | (Ye478?TS6047) BC2F4-1-29-1 XZY495-1   | China-<br>CAAS | Temperate                | Yellow       | Flint          |
| G1<br>42 | CA_BI_<br>33_03 | (Ye478?TS6047) BC2F4-1-30-1<br>XZY484-1   | (Ye478?TS6047) BC2F4-1-30-1 XZY484-1   | China-<br>CAAS | Temperate                | Yellow       | Dent           |

| Ent ry   | Brief Name      | Sample Name                              | Pedigree                                                                                       | Origin         | Environmental Adaptation | Kernel Color | Kernel Texture |
|----------|-----------------|------------------------------------------|------------------------------------------------------------------------------------------------|----------------|--------------------------|--------------|----------------|
| G1<br>43 | CA_BI_<br>33_04 | (Ye478?TS6047) BC2F4-1-82-1<br>XZY371-1  | (Ye478?TS6047) BC2F4-1-82-1 XZY371-1                                                           | China-<br>CAAS | Temperate                | Yellow       | Dent           |
| G1<br>44 | CA_BI_<br>33_05 | (Ye478?TS6047) BC2F4-1-101-1<br>XZY448-1 | (Ye478?TS6047) BC2F4-1-101-1 XZY448-1                                                          | China-<br>CAAS | Temperate                | Yellow       | Dent           |
| G1<br>45 | CA_BI_<br>34_01 | (Jinhuang96B?Qi319) BC2F3-68 Q-<br>1-68  | (Jinhuang96B?Qi319) BC2F3-68 Q-1-68                                                            | China-<br>CAAS | Temperate                | Yellow       | Semi-<br>dent  |
| G1<br>46 | CML103          | CML103                                   | P44C4F101-3-#1-1-B-###                                                                         | CIMMY<br>T     | Tropical/Subtropi<br>cal | White        | Dent           |
| G1<br>47 | CML108          | CML108                                   | P44(STE)C1F59-3-1-4-4-BB                                                                       | CIMMY<br>T     | Tropical/Subtropi<br>cal | White        | Dent           |
| G1<br>48 | CML127          | CML127                                   | ((P47/MPSWCB4)11//((MPSWCB4/VEG20)-<br>1/4/MP702//PI209135/P1162927/3/-1-3-2-B1-2-1-4-B1-B1#B1 | CIMMY<br>T     | Tropical/Subtropi<br>cal | White        | Dent           |
| G1<br>49 | CML132          | CML132                                   | B1#B1-(KC12F2/C31)-86-4-6-1-1-5#B1                                                             | CIMMY<br>T     | Tropical/Subtropi<br>cal | White        | Dent           |
| G1<br>50 | CML133          | CML133                                   | P44C4F182-2-1-2-2#B1#B1-2-2-8-B1-B1#B1                                                         | CIMMY<br>T     | Tropical/Subtropi<br>cal | White        | Dent           |
| G1<br>51 | CML135          | CML135                                   | (P47C1F26-1-#B1-1/P47C1F187-1#B1-3)2-4-1#B1-30-1-B1-B1-<br>B1#B1                               | CIMMY<br>T     | Tropical/Subtropi<br>cal | White        | Dent           |
| G1<br>52 | CML139          | CML139                                   | MP78:518-15-B1-B1#B1                                                                           | CIMMY<br>T     | Tropical/Subtropi<br>cal | Yellow       | Semi-flint     |
| G1<br>53 | CML144          | CML144                                   | P62C5F182-2-1-2-BB-3-1-##                                                                      | CIMMY<br>T     | Tropical/Subtropi<br>cal | White        | Flint          |
| G1<br>54 | CML159          | CML159                                   | P63C2F5-1-3-1-B-2-1-1-B-#                                                                      | CIMMY<br>T     | Tropical/Subtropi<br>cal | White        | Dent           |
| G1<br>55 | CML161          | CML161                                   | G25QC18H520-1-1#-1-2#-5-3-B-1-BBBB-#                                                           | CIMMY<br>T     | Tropical/Subtropi<br>cal | Yellow       | Flint          |
| G1<br>56 | CML162          | CML162                                   | G25QC1F18-8-1-2-BB-2-BBB                                                                       | CIMMY<br>T     | Tropical/Subtropi<br>cal | Yellow       | Flint          |
| G1<br>57 | CML163          | CML163                                   | G26QH31-2-2-#-2-2-1-B-1-BB-#                                                                   | CIMMY<br>T     | Tropical/Subtropi<br>cal | Yellow       | Dent           |
| G1<br>58 | CML171          | CML171                                   | G25QS4B-H13-5-B-1-1-2-B-1-BBB                                                                  | CIMMY<br>T     | Tropical/Subtropi<br>cal | Yellow       | Flint          |
| G1<br>59 | CML185          | CML185                                   | P68C1F221-3-3-2-3-BBB                                                                          | CIMMY<br>T     | Tropical/Subtropi<br>cal | White        | Dent           |
| G1<br>60 | CML191          | CML191                                   | G34QH146-1-1-4-B                                                                               | CIMMY<br>T     | Tropical/Subtropi<br>cal | Yellow       | Flint          |

| Entry    | Brief Name    | Sample Name | Pedigree                                         | Origin     | Environmental Adaptation | Kernel Color | Kernel Texture |
|----------|---------------|-------------|--------------------------------------------------|------------|--------------------------|--------------|----------------|
| G1<br>61 | CML192        | CML192      | G34QH174-3-1-2-BB                                | CIMMY<br>T | Tropical/Subtropical     | Yellow       | Dent           |
| G1<br>62 | CML201        | CML201      | MSR85-1S3-1-1-BB                                 | CIMMY<br>T | Tropical/Subtropical     | White        | Dent           |
| G1<br>63 | CML202        | CML202      | ZSR923S4BULK-5-1-BB                              | CIMMY<br>T | Tropical/Subtropical     | White        | Semi-dent      |
| G1<br>64 | CML206        | CML206      | [EV7992#/EVPO44SRBC3]#BF37SR-2-3SR-2-4-3-BB      | CIMMY<br>T | Tropical/Subtropical     | White        | Semi-dent      |
| G1<br>65 | CML216        | CML216      | [MSR:131]-3-3-3-5-BB                             | CIMMY<br>T | Tropical/Subtropical     | White        | Semi-flint     |
| G1<br>66 | CML219        | CML219      | [EV8730SR(BC6)]-171-1-1-2-#-B                    | CIMMY<br>T | Tropical/Subtropical     | White        | Flint          |
| G1<br>67 | CML287        | CML287      | (P24F26/27F1)-4-1-B-1-1-BB-F                     | CIMMY<br>T | Tropical/Subtropical     | Yellow       | Flint          |
| G1<br>68 | CML311<br>MBR | CML311MBR   | MAS[MSR/312]-117-2-2-1-B*4-B-B-B                 | CIMMY<br>T | Tropical/Subtropical     | White        | Semi-dent      |
| G1<br>69 | CML316        | CML316      | P500C0F114-1-1-B*3                               | CIMMY<br>T | Tropical/Subtropical     | White        | Semi-dent      |
| G1<br>70 | CML322        | CML322      | 89[L/LMBR]17-B-5-3-1-4-B*4                       | CIMMY<br>T | Tropical/Subtropical     | White        | Flint          |
| G1<br>71 | CML330        | CML330      | 89[SUWAN8422]/[P47S3/MP78:518]#-7-1-1-1-1-B-#-BB | CIMMY<br>T | Tropical/Subtropical     | White        | Semi-dent      |
| G1<br>72 | CML341        | CML341      | LPSEQC3-H1-2-2-1-1-##-BB                         | CIMMY<br>T | Tropical/Subtropical     | White        | Semi-dent      |
| G1<br>73 | CML402        | CML402      | AC8222-6-2-2-B-##-2-BBB-1-#-B*9                  | CIMMY<br>T | Tropical/Subtropical     | White        | Flint          |
| G1<br>74 | CML411        | CML411      | P28C7-S4-#-BBBBBBBBBBBB                          | CIMMY<br>T | Tropical/Subtropical     | Yellow       | Dent           |
| G1<br>75 | CML418        | CML418      | G15C22H100#-2-2-6-1-2-BBBBB                      | CIMMY<br>T | Tropical/Subtropical     | White        | Flint          |
| G1<br>76 | CML442        | CML442      | [M37W/ZM607#BF37SR-2-3SR-6-2-X]-8-2-X-1-BBB      | CIMMY<br>T | Tropical/Subtropical     | White        | Dent           |
| G1<br>77 | CML444        | CML444      | P43C9-1-1-1-1-1-BBBB                             | CIMMY<br>T | Tropical/Subtropical     | White        | Semi-dent      |
| G1<br>78 | CML468        | CML468      | P28C9F113-3-1-4-B*7                              | CIMMY<br>T | Tropical/Subtropical     | Yellow       | Semi-dent      |

| Ent ry | Brief Name | Sample Name | Pedigree                                                                           | Origin  | Environmental Adaptation | Kernel Color | Kernel Texture |
|--------|------------|-------------|------------------------------------------------------------------------------------|---------|--------------------------|--------------|----------------|
| G1 79  | CML474     | CML474      | SW92145-2EV-13-1-BB                                                                | CIMMY T | Tropical/Subtropical     | Yellow       | Semi-dent      |
| G1 80  | CML479     | CML479      | (P24STE-5/24STE-17)-BBBB-##-B-3-B-1-B*4                                            | CIMMY T | Tropical/Subtropical     | Yellow       | Flint          |
| G1 81  | CML5       | CML5        | P21C5F133-1-B-##-B                                                                 | CIMMY T | Tropical/Subtropical     | White        | Dent           |
| G1 82  | CML504     | CML504      | [COMPE2/P43SR//COMPE2]F#-20-1-1-B-1-BB-6-BB                                        | CIMMY T | Tropical/Subtropical     | White        | Semi-flint     |
| G1 83  | CML505     | CML505      | [Ent320:92SEW2-77/[DMRESR-W]EarlySel-#I-2-4-B/CML386]-B-11-3-B-2-#-B*4             | CIMMY T | Tropical/Subtropical     | White        | Semi-flint     |
| G1 84  | CML507     | CML507      | [[[K64R/G16SR]-39-1/[K64R/G16SR]-20-2]-5-1-2-B*4/CML390]-B-38-1-B-7-#-B*6          | CIMMY T | Tropical/Subtropical     | White        | Semi-flint     |
| G1 85  | CML508     | CML508      | [89[G27/TEWTSRPool]#-278-2-X-B/[COMPE2/P43SR//COMPE2]F#-20-1-1]-B-32-2-B-4-#-2-B*5 | CIMMY T | Tropical/Subtropical     | White        | Semi-flint     |
| G1 86  | CML509     | CML509      | [Ent52:92SEW1-2/[DMRESR-W]EarlySel-#L-2-1-B/CML386]-B-22-1-B-4-#-1-B*4             | CIMMY T | Tropical/Subtropical     | White        | Semi-flint     |
| G1 87  | CML511     | CML511      | [CML389/CML176]-B-29-2-2-B*5                                                       | CIMMY T | Tropical/Subtropical     | White        | Semi-flint     |
| G1 88  | CML68      | CML68       | P32C5F71-2-2-2-1-B1-8-B1-B1#B1                                                     | CIMMY T | Tropical/Subtropical     | White        | Flint          |
| G1 89  | CML80      | CML80       | G32C19H233-2-#1-B-####B                                                            | CIMMY T | Tropical/Subtropical     | White        | Semi-dent      |
| G1 90  | CML84      | CML84       | G32C19H512-2-#1-B-####-6-B                                                         | CIMMY T | Tropical/Subtropical     | White        | Dent           |
| G1 91  | CML85      | CML85       | P34C5F21-2-#1-2-2-#                                                                | CIMMY T | Tropical/Subtropical     | White        | Semi-flint     |
| G1 92  | CML89      | CML89       | P34C5F188-1-#2-9-1-###                                                             | CIMMY T | Tropical/Subtropical     | White        | Flint          |
| G1 93  | CML94      | CML94       | P42C4F130-1-1-B-##                                                                 | CIMMY T | Tropical/Subtropical     | White        | Semi-dent      |
| G1 94  | CML96      | CML96       | P42C4F233-1-#2-B-#*6-2-B                                                           | CIMMY T | Tropical/Subtropical     | White        | Dent           |
| G1 95  | CML97      | CML97       | P42C4F236-1-1-B-#                                                                  | CIMMY T | Tropical/Subtropical     | White        | Semi-dent      |
| G1 96  | CML98      | CML98       | P42C4F268-1-1-B-##                                                                 | CIMMY T | Tropical/Subtropical     | White        | Semi-dent      |

| Ent ry | Brief Name | Sample Name                                   | Pedigree                                     | Origin  | Environmental Adaptation | Kernel Color | Kernel Texture |
|--------|------------|-----------------------------------------------|----------------------------------------------|---------|--------------------------|--------------|----------------|
| G1 97  | CML99      | CML99                                         | P42(STE)C1F39-2-2-1-1-BB                     | CIMMY T | Tropical/Subtropical     | White        | Semi-dent      |
| G1 98  | CMT_L_081  | ZM521B-66-4-1-1-BB-B-B-B                      | ZM521B-66-4-1-1-BB-B-B-B                     | CIMMY T | Tropical/Subtropical     | White        | Semi-dent      |
| G1 99  | CMT_L006   | DTPYC9-F11-2-3-1-2-B                          | DTPYC9-F11-2-3-1-2-B                         | CIMMY T | Tropical/Subtropical     | Yellow       | Flint          |
| G2 00  | CMT_L007   | CL-02841 Ac8928-40-1-1-1-1-B                  | CL-02841Ac8928-40-1-1-1-1-B                  | CIMMY T | Tropical/Subtropical     | Yellow       | Dent           |
| G2 01  | CMT_L008   | CL-04934 (P49C2H12-5-4xP23C2-11-1)-2-2-2-B*10 | CL-04934(P49C2H12-5-4xP23C2-11-1)-2-2-2-B*10 | CIMMY T | Tropical/Subtropical     | White        | Semi-dent      |
| G2 02  | CMT_L009   | LAMA2002-10-1-B                               | LAMA2002-10-1-B                              | CIMMY T | Tropical/Subtropical     | Yellow       | Semi-dent      |
| G2 03  | CMT_L010   | LAMA2002-20-6-B                               | LAMA2002-20-6-B                              | CIMMY T | Tropical/Subtropical     | Yellow       | Semi-dent      |
| G2 04  | CMT_L011   | MBR C6 Bc F234-1-B-#-1-1-B-B-B-B-B            | MBR C6 Bc F234-1-B-#-1-1-B-B-B-B-B           | CIMMY T | Tropical/Subtropical     | White        | Flint          |
| G2 05  | CMT_L012   | Cuba/Guad C3 F53-3-1-1-B-B-B                  | Cuba/Guad C3 F53-3-1-1-B-B-B                 | CIMMY T | Tropical/Subtropical     | White        | Semi-dent      |
| G2 06  | CMT_L013   | LAMA2002-60-9-B                               | LAMA2002-60-9-B                              | CIMMY T | Tropical/Subtropical     | Yellow       | Dent           |
| G2 07  | CMT_L014   | SW1SR/COMPE1-W###52#-19-5-1-B*5               | SW1SR/COMPE1-W###52#-19-5-1-B*5              | CIMMY T | Tropical/Subtropical     | White        | Flint          |
| G2 08  | CMT_L015   | La Posta Seq.C4 F140-1-1-1                    | La Posta Seq.C4 F140-1-1-1                   | CIMMY T | Tropical/Subtropical     | White        | Flint          |
| G2 09  | CMT_L016   | 761B B2 Bco x751B-B-1-1-B-B-B-B-B             | 761B B2 Bco x751B-B-1-1-B-B-B-B-B            | CIMMY T | Tropical/Subtropical     | White        | Semi-dent      |
| G2 10  | CMT_L017   | Cuba/Guad C3 F125-2-2-1-B-B-B                 | Cuba/Guad C3 F125-2-2-1-B-B-B                | CIMMY T | Tropical/Subtropical     | Yellow       | Semi-dent      |
| G2 11  | CMT_L018   | P591c4 1y2 GEN F3-1-1-2-B-B-B                 | P591c4 1y2 GEN F3-1-1-2-B-B-B                | CIMMY T | Tropical/Subtropical     | Yellow       | Semi-dent      |
| G2 12  | CMT_L019   | CML-311/MBRC3BcF55-3-1-1-B-B-B                | CML-311/MBRC3BcF55-3-1-1-B-B-B               | CIMMY T | Tropical/Subtropical     | White        | Flint          |
| G2 13  | CMT_L020   | P590 C7 Blancos F57-1-3-1-B-B-B               | P590 C7 Blancos F57-1-3-1-B-B-B              | CIMMY T | Tropical/Subtropical     | White        | Semi-dent      |
| G2 14  | CMT_L080   | [CML390/CML206]-BB-2-4-BBBB-B-B               | [CML390/CML206]-BB-2-4-BBBB-B-B-B            | CIMMY T | Tropical/Subtropical     | White        | Semi-dent      |

| Entry | Brief Name | Sample Name                                   | Pedigree                                     | Origin  | Environmental Adaptation | Kernel Color | Kernel Texture |
|-------|------------|-----------------------------------------------|----------------------------------------------|---------|--------------------------|--------------|----------------|
| G2 15 | CMT_L2 00  | CML222/CML144//CML159//POOL 15QPMRSR-B-3-B-B  | CML222/CML144//CML159//POOL15QPMRSR-B-3-B-B  | CIMMY T | Tropical/Subtropical     | White        | Semi-flint     |
| G2 16 | CMT_L2 07  | CML445/CML144//CML159//POOL 15QPMRSR-B-36-B-B | CML445/CML144//CML159//POOL15QPMRSR-B-36-B-B | CIMMY T | Tropical/Subtropical     | White        | Flint          |
| G2 17 | CMT_L2 08  | CML221/CML144//CML159//POOL 15QPMRSR-B-48-B-B | CML221/CML144//CML159//POOL15QPMRSR-B-48-B-B | CIMMY T | Tropical/Subtropical     | White        | Semi-flint     |
| G2 18 | CMT_L2 15  | CML216/CML144//CML159//POOL 15QPMRSR-B-22-B-B | CML216/CML144//CML159//POOL15QPMRSR-B-22-B-B | CIMMY T | Tropical/Subtropical     | White        | Semi-flint     |
| G2 19 | CMT_L2 18  | DTPYC9-F46-3-9-1-1-B-B                        | DTPYC9-F46-3-9-1-1-B-B                       | CIMMY T | Tropical/Subtropical     | Yellow       | Flint          |
| G2 20 | CMT_L2 19  | La Posta Seq C7-F64-2-6-2-1-B-B-B             | La Posta Seq C7-F64-2-6-2-1-B-B-B            | CIMMY T | Tropical/Subtropical     | White        | Flint          |

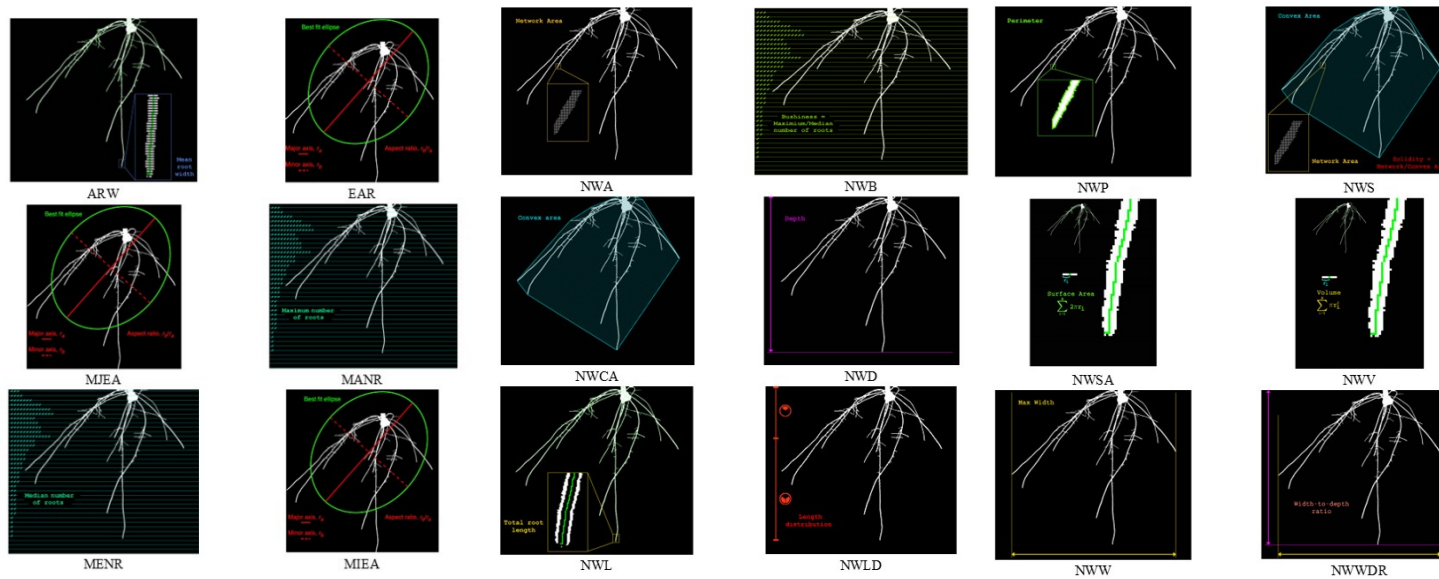

**Figure S1.** A vertical line sweep, which evaluated the number of roots that crossed a horizontal line and then calculated the median of all values for the network's extent.
